# Supplementary material for: Flexible High-Color-Purity Structural Color Filters Based on a Higher-Order Optical Resonance Suppression
Source: PubMed Central journal article supplement (PMC6797723; doi:10.1038/s41598-019-51165-1), 2019-10-17
Supplement: 41598_2019_51165_MOESM1_ESM.pdf [file 41598_2019_51165_MOESM1_ESM.pdf]

## Supplementary Information

# Flexible High-Color-Purity Structural Color Filters Based on a Higher-Order Optical Resonance Suppression

Kyu-Tae Lee<sup>1,2,†</sup>, Sung Yong Han<sup>3,†</sup>, Zijia Li<sup>4,5</sup>, Hyoung Won Baac<sup>2,\*</sup> & Hui Joon Park<sup>5,\*</sup>

<sup>1</sup>Department of Physics, Inha University, Incheon 22212, South Korea

<sup>2</sup>Department of Electrical and Computer Engineering, Sungkyunkwan University, Suwon 16419, South Korea

<sup>3</sup>Department of Energy Systems Research, Ajou University, Suwon 16499, South Korea

<sup>4</sup>Department of Energy Science, Sungkyunkwan University, Suwon 16419, South Korea

<sup>5</sup>Department of Organic and Nano Engineering, Hanyang University, Seoul 04763, South Korea

\* Prof. Hui Joon Park (huijoon@hanyang.ac.kr)

Prof. Hyoung Won Baac (hwbaac@skku.edu)

† These authors contributed equally to this work.

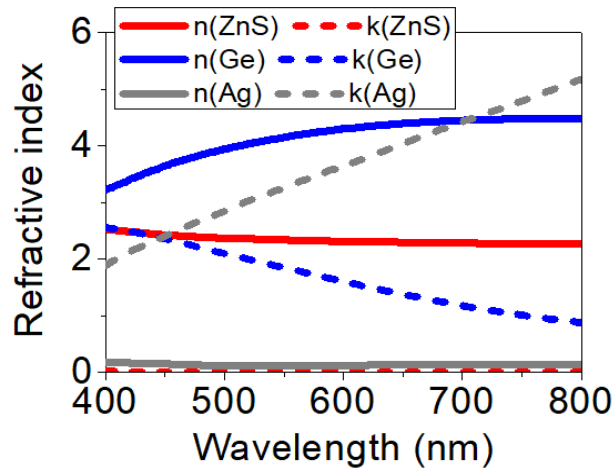

**Figure S1.** Refractive indices of ZnS, Ge, and Ag, measured by using a spectroscopic ellipsometer (Elli-SE, Ellipso Technology Co.).

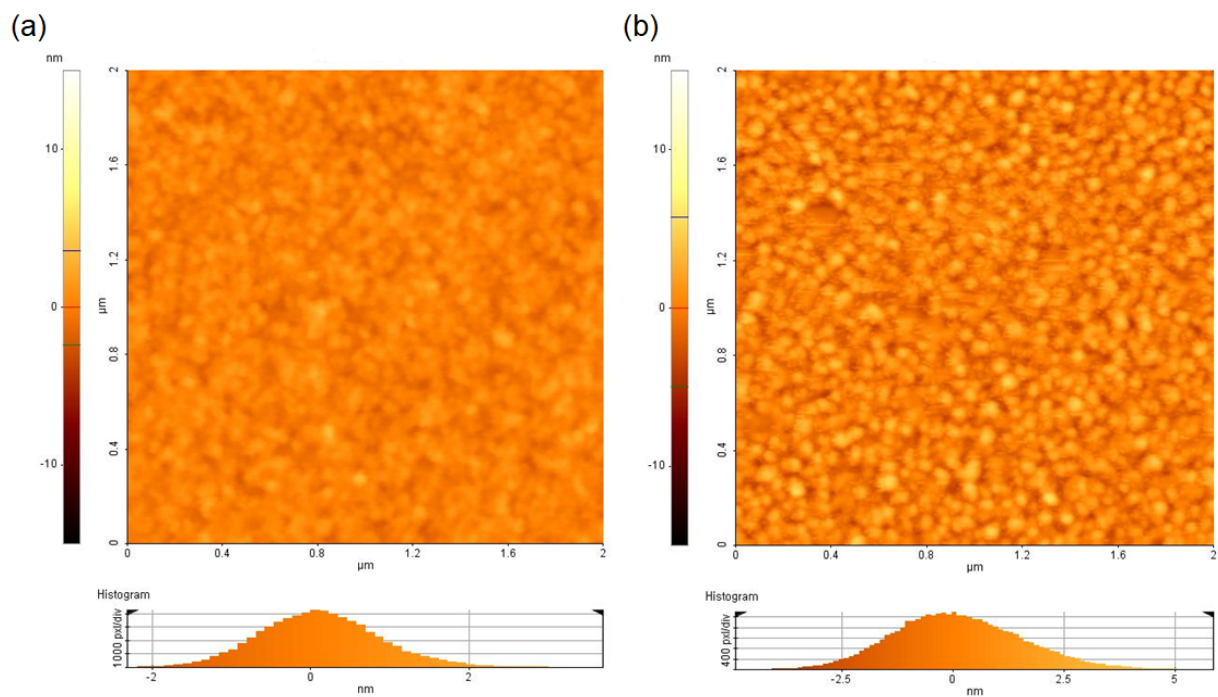

**Figure S2.** Atomic force microscopy (AFM) images of (a) 45 nm-thick ZnS and (b) 35 nm-thick Ag on the Si substrate (XE100, Park Systems, Korea).

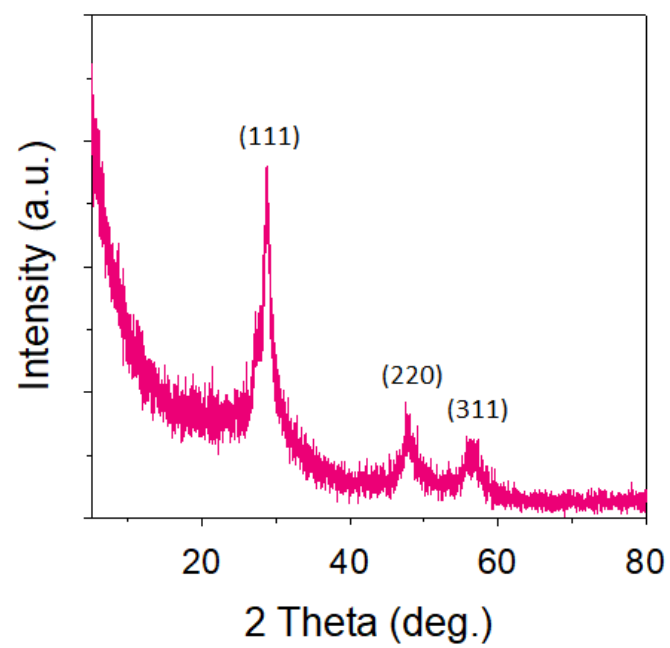

**Figure S3.** X-ray diffraction (XRD) pattern of ZnS (Ultima III, Rigaku, Japan).

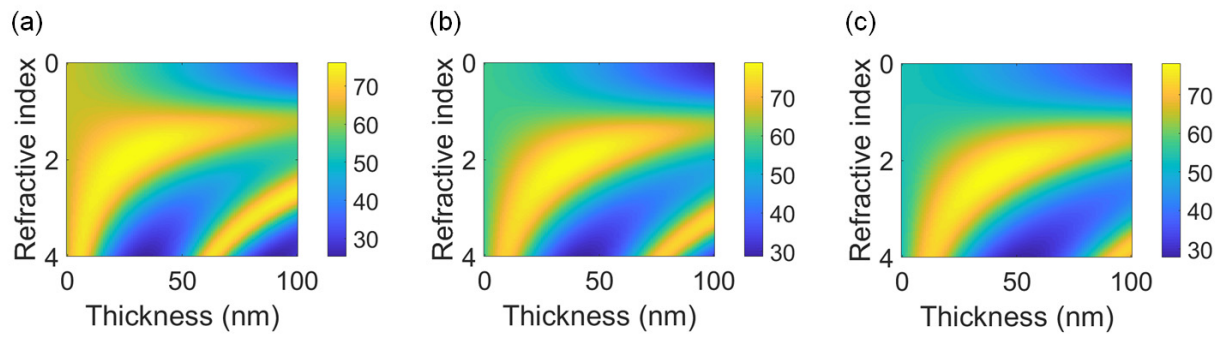

**Figure S4.** 2D contour plots of transmission as a function of a thickness and a refractive index of a bottom anti-reflection layer for (a) blue (B), (b) green (G), and (c) red (R) colors at 460, 545, and 650 nm, respectively.

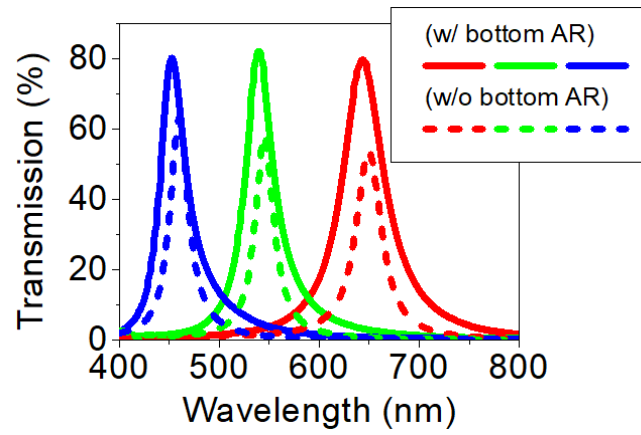

**Figure S5.** Simulated transmission spectra with (solid lines) and without (dashed lines) the bottom anti-reflection coating.

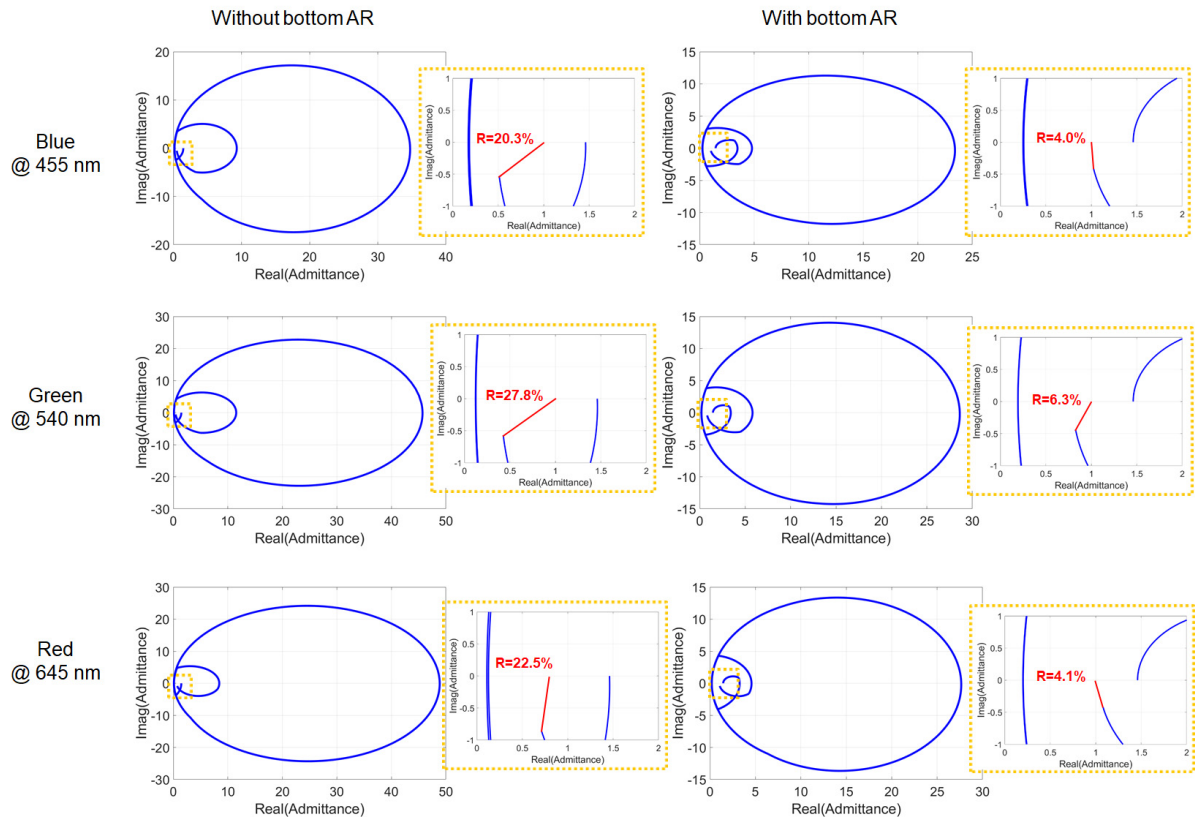

**Figure S6.** Admittance diagrams without (left) and with (right) the bottom anti-reflection coating for the RGB colors. Insets show an expanded view of each case along with a calculated reflectance at the resonant wavelengths.

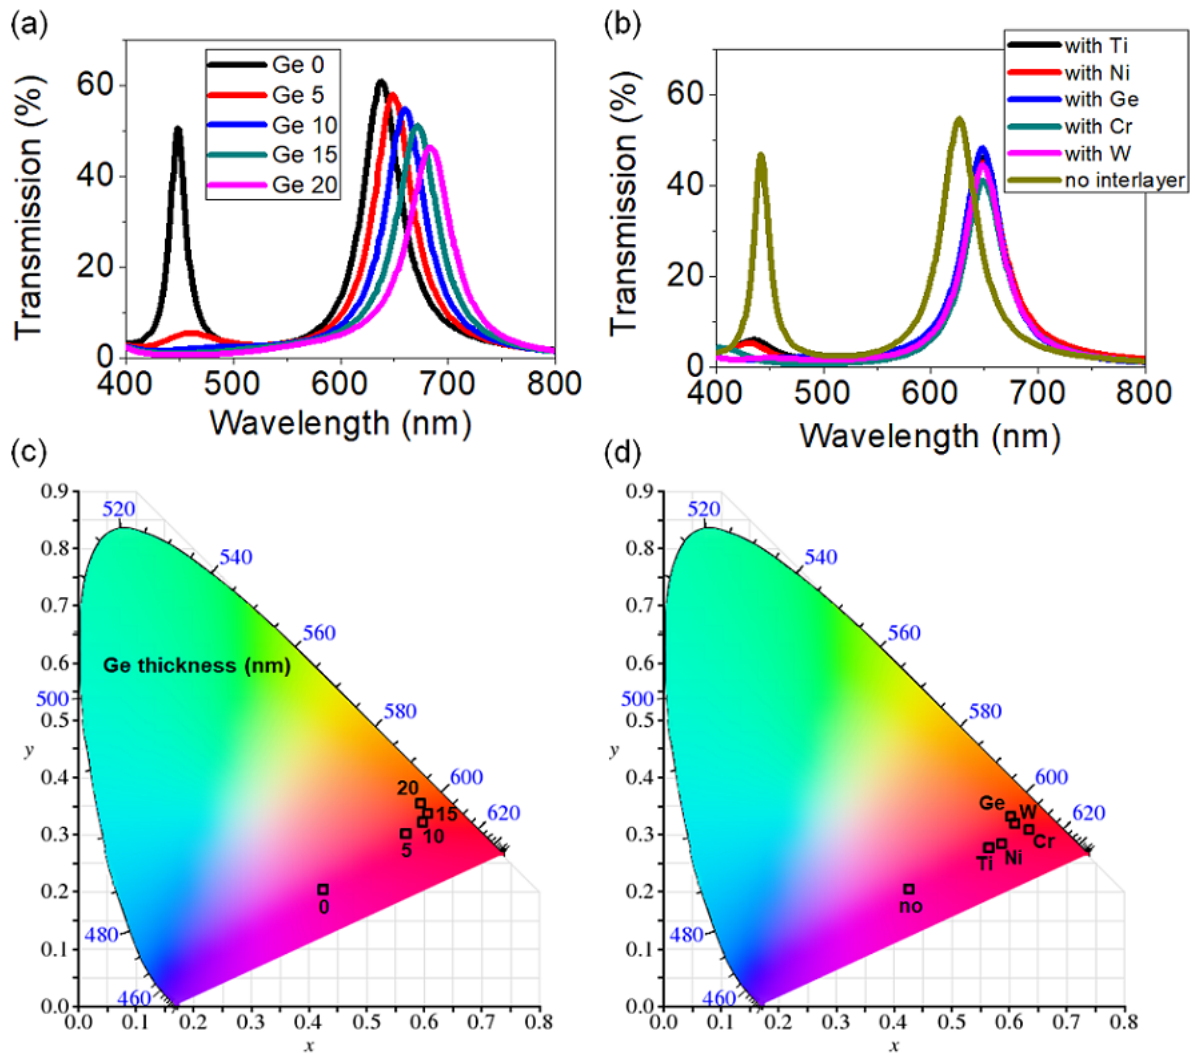

**Figure S7.** Simulated transmission spectra and the corresponding color purity depending on a thickness of Ge and different light-absorbing materials.



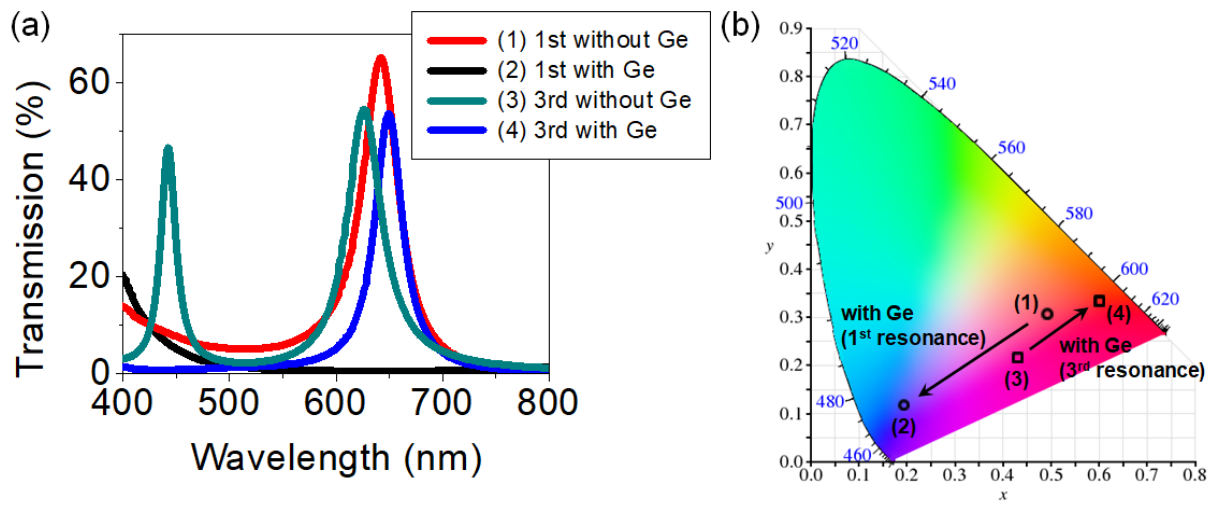

**Figure S8.** Simulated transmission spectra and the corresponding color purity of the structural color filters based on 1st and 3rd order resonances, and 3rd and 5th order resonances.

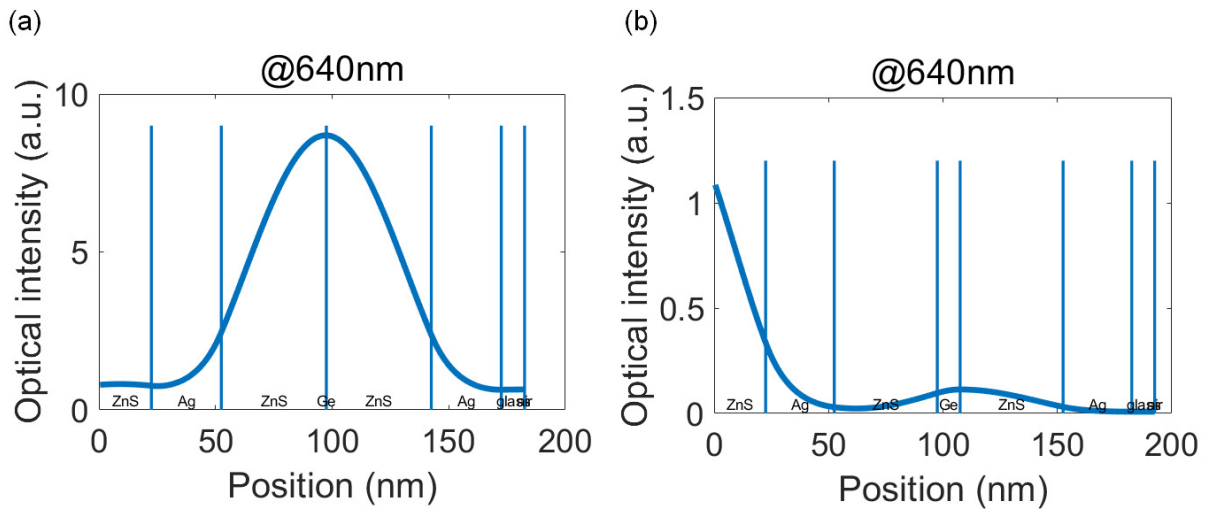

**Figure S9.** Electric field distributions at 640 nm for the red structural color filter employing 1st order resonances.

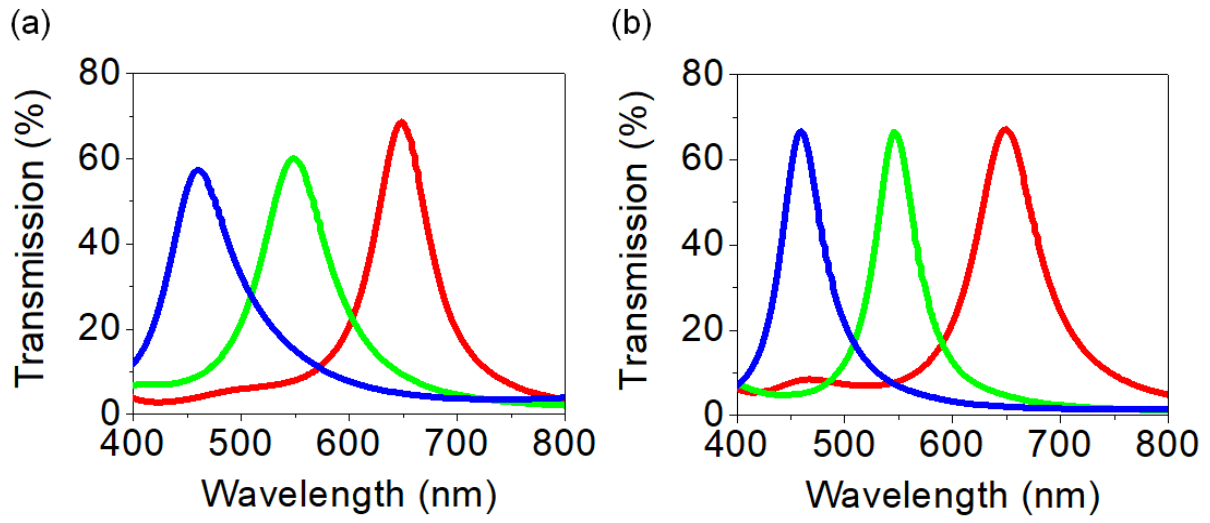

**Figure S10.** (a) Measured and (b) simulated transmission spectra of the flexible structural color filters at normal incidence.
